# Supplementary material for: Enhanced electromagnon excitations in Nd-doped BiFeO3 nanoparticles near morphotropic phase boundaries
Source: Royal Society of Chemistry journal article supplement (doi:10.1039/c9cp04194j), 2019-01-01
Supplement: c9cp04194j1.pdf [file c9cp04194j1.pdf]

## *Supplementary data*

### Enhanced electromagnon excitations in Nd-doped BiFeO<sub>3</sub> nanoparticles near morphotropic phase boundaries

Yuan Zhang,<sup>1†</sup> Yi Zhang,<sup>1†</sup> Quan Guo,<sup>2</sup> Dongwen Zhang,<sup>2</sup> Shuaizhi Zheng,<sup>1</sup> Ming Feng,<sup>3</sup> Xiangli  
Zhong,<sup>1\*</sup> Congbing Tan,<sup>1</sup> Zhihui Lu,<sup>2</sup> Jinbin Wang,<sup>1</sup> Pengfei Hou,<sup>1</sup> Yichun Zhou<sup>1</sup> and Jianmin

Yuan<sup>2\*</sup>

<sup>1</sup>School of Materials Science and Engineering, Xiangtan University, Hunan 411105, China;

<sup>2</sup>Department of Physics, College of Science, National University of Defense Technology, Hunan  
410073, China;

<sup>3</sup>Key Laboratory of Functional Materials Physics and Chemistry of the Ministry of Education,  
Jilin Normal University, Changchun 130103, China

---

<sup>†</sup> These authors contributed equally to this work.

\* Authors to whom the correspondence should be addressed: e-mail: xlzhong@xtu.edu.cn

\* Authors to whom the correspondence should be addressed: e-mail: jmyuan@nudt.edu.cn

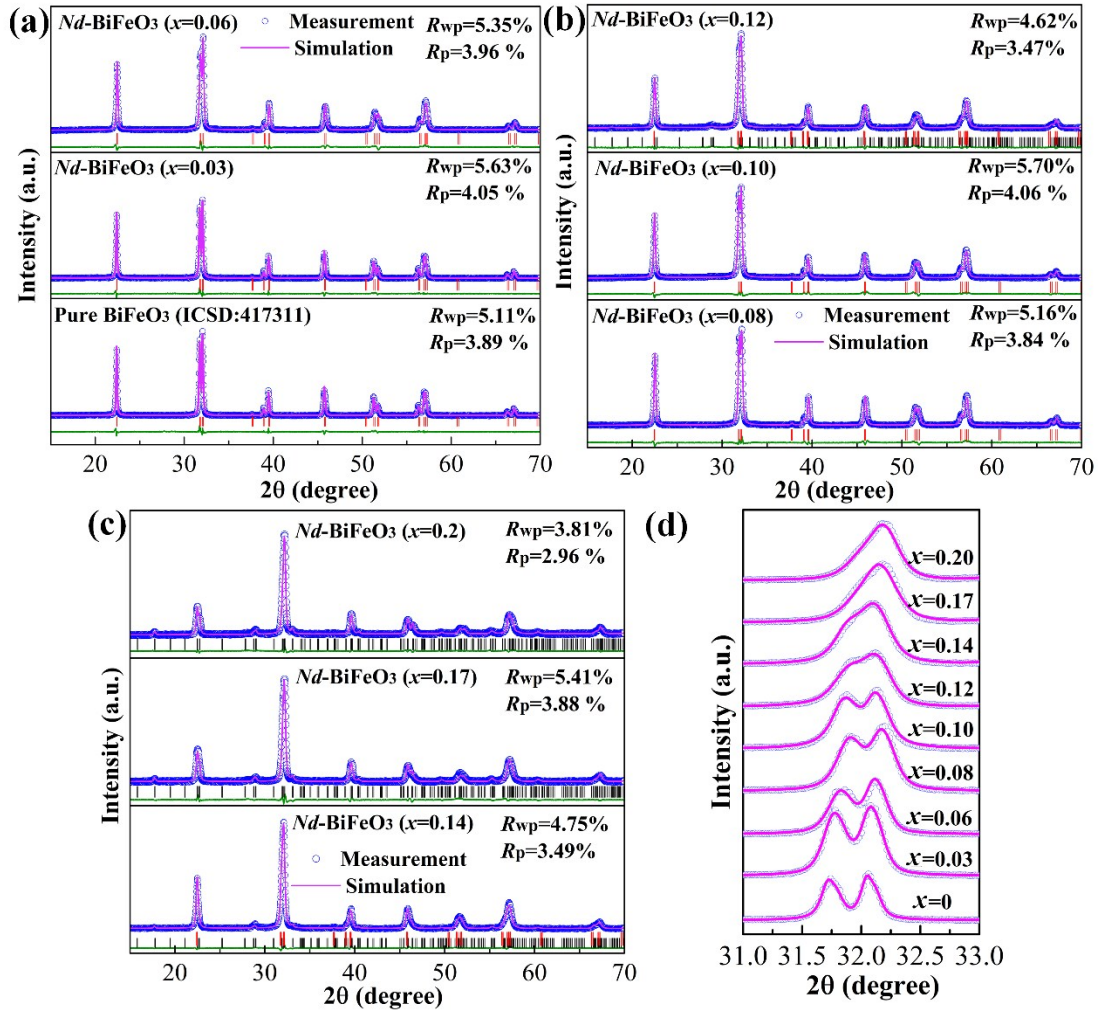

Figure S1 (a-c) Comparison between the measured and simulated XRD patterns for  $\text{Bi}_{1-x}\text{Nd}_x\text{FeO}_3$  (BNFO<sub>x</sub>) nanoparticles in the range of  $x=0\sim0.2$ . (d) The magnified patterns of (104) and (110) diffraction peaks.

The Rietveld refined XRD patterns of  $\text{Bi}_{1-x}\text{Nd}_x\text{FeO}_3$  samples are shown in details in Figure S1 respectively, it can be found that the simulated XRD results are coincide well with the measured results and the lattice parameters can be defined.

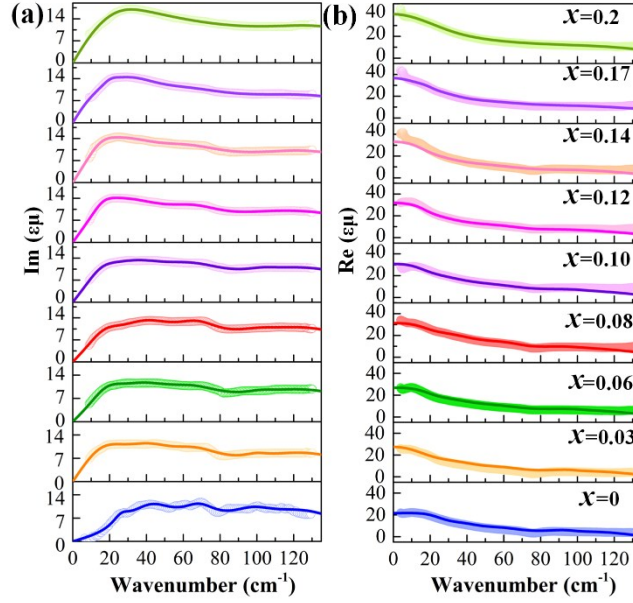

Figure S2 THz spectra of (a) imaginary ( $\epsilon\mu$ ), and (b) real parts ( $\epsilon\mu$ ) of  $\text{BNFO}_x$  nanoparticles.

As the pellets for THz spectra were prepared by mixing  $\text{Bi}_{1-x}\text{Nd}_x\text{FeO}_3$  ( $\text{BNFO}_x$ ) nanoparticles with pure polyethylene (PE) power, the complex dielectric is characterized by effective medium theories of Polder and van Santen models for rods  $\frac{\epsilon_R - \epsilon_h}{5\epsilon_R + \epsilon_p} = f_p \frac{\epsilon_p - \epsilon_h}{3(\epsilon_p + \epsilon_R)}$  to eliminate the influence of the mixed PE power.<sup>1</sup> The  $\epsilon_p$ ,  $\epsilon_h$  and  $\epsilon_R$  are the permittivity of the  $\text{BNFO}_x$  nanoparticles, host pure PE power and mixtures, respectively. The  $f_p$  is the volumetric particle fraction ( $0 < f_p < 1$ ) of the doping  $\text{BNFO}_x$  nanoparticles with the relation of  $f_p = f_w / (f_w + (1 - f_w)\rho_p / \rho_h)$ , and the  $f_w$  is the weight fraction of  $\text{BNFO}_x$  nanoparticles and pure PE. The  $\rho_p$  and  $\rho_h$  is the densities of  $\text{BNFO}_x$  nanoparticles and pure PE power, respectively.<sup>2-6</sup> The fitted parameters are shown in Table *SI* with the high-frequency permittivity of  $\epsilon_\infty = 4.0$  in all nanoparticles.

**Table S1** Fitted parameters of electromagnons modes  $I$  and  $2$ , and, phonon modes  $E_1$ ,  $E_2$  and  $A_1$  for the  $\text{BNFO}_x$  nanoparticles with  $\varepsilon_\infty=4.0$ .<sup>7</sup>

| Mode | $x$                        | 0     | 0.03  | 0.06  | 0.08  | 0.10   | 0.12  | 0.14   | 0.17   | 0.20  |
|------|----------------------------|-------|-------|-------|-------|--------|-------|--------|--------|-------|
| EM   | $\gamma_I(\text{cm}^{-1})$ | 11.97 | 40.04 | 26.47 | 24.81 | 25.88  | 17.29 | 26.92  | 9.53   | ...   |
|      | $\gamma_2(\text{cm}^{-1})$ | 36.28 | 39.60 | 50.75 | 46.24 | 55.45  | 71.87 | 55.65  | 51.06  | 44.92 |
|      | $\Delta\varepsilon_I$      | 2.22  | 2.92  | 2.88  | 2.28  | 2.22   | 0.68  | 4.67   | 5.13   | 18.81 |
|      | $\gamma_I(\text{cm}^{-1})$ | 26.69 | 40.41 | 44.51 | 34.01 | 43.68  | 23.86 | 59.32  | 331.33 | 315.9 |
| PH   | $\Delta\varepsilon_2$      | 1.69  | 0.23  | 0.19  | 2.22  | 1.81   | 5.95  | 0.96   | 11.39  | 3.03  |
|      | $\gamma_2(\text{cm}^{-1})$ | 35.19 | 18.05 | 21.47 | 88.02 | 131.77 | 258.6 | 111.17 | 208.22 | 79.16 |
|      | $\Delta\varepsilon_3$      | 3.48  | 4.54  | 5.76  | 5.39  | 6.5    | 4.14  | 6.92   | 1.70   | 6.27  |
|      | $\gamma_3(\text{cm}^{-1})$ | 61.97 | 81.05 | 94.08 | 88.5  | 103.76 | 97.48 | 105.1  | 66.96  | 239.7 |

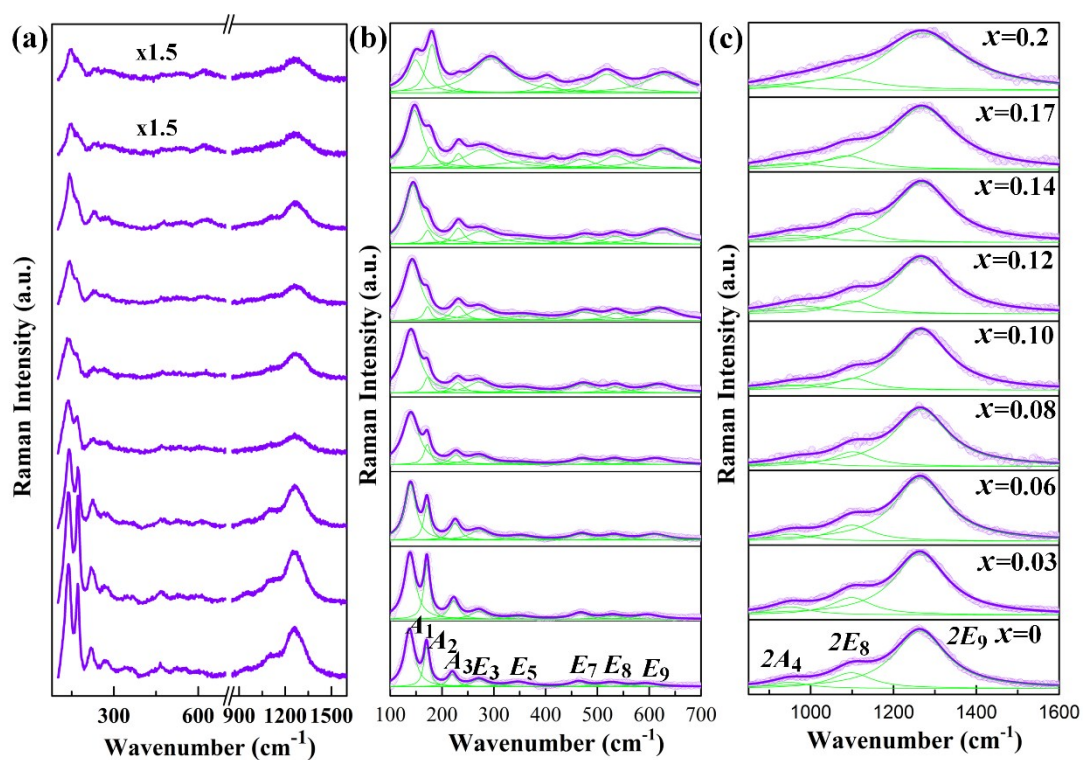

Figure S3 (a) Measured un-polarized Raman spectra for  $\text{BNFO}_x$  nanoparticles between 100~1600  $\text{cm}^{-1}$ . (b) A magnified view between 100~700  $\text{cm}^{-1}$  fitted by Lorentzian function. (c) A magnified view between 850~1600  $\text{cm}^{-1}$  fitted by Lorentzian function.

In the  $R3c$  BFO structure, the ferroelectric distortion originates from the stereochemical activity of  $\text{Bi}^{3+} 6s^2$  lone electron pair, where the Fe-O-Fe bond angle gives strong antiferromagnetic superexchange interaction.<sup>8, 9</sup> The Bi atoms only participate in low-frequency modes up to  $167 \text{ cm}^{-1}$ , while the Fe atoms are mainly involved in modes between  $152\sim 262 \text{ cm}^{-1}$  with possible contributions to some higher-frequency modes, and the motion oxygen atoms dominate the modes above  $262 \text{ cm}^{-1}$ .<sup>9</sup> The higher frequency orders of  $E$  modes at  $900\sim 1600 \text{ cm}^{-1}$  may be associated with the strong coupling of spin-lattice from the interaction of adjacent magnetic sub lattices of BFO,<sup>10</sup> since they are related to the octahedral rotation with critical role of weak magnetism. Obviously, the  $A_1$  and low frequency  $E$  modes ( $<400 \text{ cm}^{-1}$ ) play an important role in ferroelectrics, which all mainly contributes to Bi-O bonds, while the  $2E_8$  and  $2E_9$  modes exhibit essential roles in antiferromagnetism through superexchange. Therefore, the un-polarized Raman scattering spectra of  $\text{BNFO}_x$  nanoparticles at  $0\sim 1600 \text{ cm}^{-1}$  are measured at room temperatures shown in Figure S3(a). Three sharp peaks below  $250 \text{ cm}^{-1}$  are assigned as  $A_1$ ,  $A_2$  and  $A_3$  modes, and the three peaks at high frequency of  $900\sim 1600 \text{ cm}^{-1}$  are labeled  $2A_4$ ,  $2E_8$  and  $2E_9$  modes. One can see that these six peaks are weaken in intensities and broaden in linewidth gradually. The measured spectra are fitted by decomposing the curves into individual Lorentzian components shown in Figure S3(b) and S3(c), where the peak positions of each component are obtained.

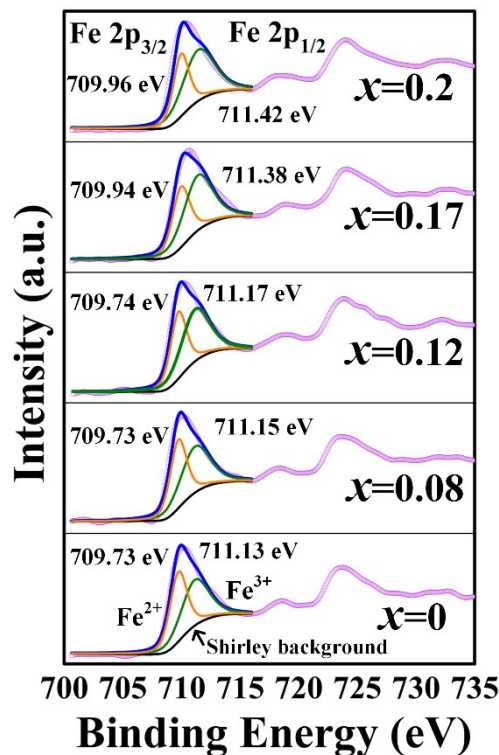

Figure S4 Fe 2p XPS spectra of BNFO<sub>x</sub> nanoparticles.

The Fe 2p spectra are shown in Figure S4 with the C 1s peak at 286.58 eV. It can be found that the Fe 2p core level consists of two components of 2p<sub>3/2</sub> (710.43 eV) and 2p<sub>1/2</sub> (724.01 eV) with spin-orbit splitting energy of 13.58 eV, which is coincident with the theoretical value of  $\Delta_{\text{Fe } 2p}$  (13.6 eV) for Fe<sub>2</sub>O<sub>3</sub>.<sup>11</sup> When we fit the Fe 2p<sub>3/2</sub> by mixed Gauss-Lorentz function of Shirley background, we can see that the binding energy of Fe 2p<sub>3/2</sub> is composed of Fe<sup>2+</sup> and Fe<sup>3+</sup> at 709.73 eV and 711.12 eV in pure BFO, respectively. While the binding energy of Fe 2p<sub>3/2</sub> at x=0.2 presents 709.96 eV for Fe<sup>2+</sup> and 711.42 eV for Fe<sup>3+</sup>, respectively. Obviously, the peaks of Fe 2p<sub>3/2</sub> gradual shift into higher binding energy, which indicates an increasing bond strength between atoms.

## REFERENCES:

- (1). Scheller, M.; Jansen, C.; Koch, M. Applications of effective medium theories in the terahertz regime. *Recent Optical and Photonic Technologies, InTech*, 2010.
- (2). Ung, B.; Dupuis, A.; Stoeffler, K.; Dubois, C.; Skorobogatiy, M. High-refractive-index composite materials for terahertz waveguides: trade-off between index contrast and absorption loss. *J. Opt. Soc. Am. B* **2011**, 28, 917.
- (3). Goian, V.; Kamba, S.; Kadlec, C.; Nuzhnyy, D.; Kužel, P.; Moreira, J. A.; Almeida, A.; Tavares, P. B. THz and infrared studies of multiferroic hexagonal  $Y_{1-x}Eu_xMnO_3$  ( $x=0-0.2$ ) ceramics. *Phase Transit.* **2010**, 83, 931.
- (4). Sushkov, A. B.; Aguilar, R. V.; Park, S.; Cheong, S. W.; Drew, H. D. Electromagnons in Multiferroic  $YMn_2O_5$  and  $TbMn_2O_5$ . *Phys. Rev. Lett.* **2007**, 98, 027202.
- (5). Aguilar, R. V.; Sushkov, A. B.; Zhang, C. L.; Choi, Y. J.; Cheong, S. W.; Drew, H. D. Colossal magnon-phonon coupling in multiferroic  $Eu_{0.75}Y_{0.25}MnO_3$ . *Phys. Rev. B* **2007**, 76, 060404.
- (6). Komandin, G. A.; Torgashev, V. I.; Volkov, A. A.; Porodinkov, O. E.; Spektor, I. E.; Bush, A. A. Optical Properties of  $BiFeO_3$  Ceramics in the Frequency Range 0.3-30.0 THz. *Phys. Solid State* **2010**, 52, 734.
- (7). Kamba, S.; Nuzhnyy, D.; Savinov, M.; Šebek, J.; Petzelt, J.; Prokleška, J.; Haumont, R.; Kreisel, J. Infrared and terahertz studies of polar phonons and magnetodielectric effect in multiferroic  $BiFeO_3$  ceramics. *Phys. Rev. B* **2007**, 75, 024403.
- (8). Yuan, G. L. Or, S. W.; Chan, H. L. W. Raman scattering spectra and ferroelectric properties of  $Bi_{1-x}Nd_xFeO_3$  ( $x=0-0.2$ ) multiferroic ceramics. *J. Appl. Phys.* **2007**, 101, 064101.
- (9). Hermet, P.; Goffinet, M.; Kreisel, J.; Ghosez, P. Raman and infrared spectra of multiferroic bismuth ferrite from first principles. *Phys. Rev. B* **2007**, 75, 220102.
- (10). Ramirez, M. O.; Krishnamurthi, M.; Denev, S.; Kumar, A.; Yang, S.-Y.; Chu, Y.-H.; Saiz, E.; Seidel, J.; Pyatakov, A. P.; Bush, A.; Viehland, D.; Orenstein, J.; Ramesh, R.; Gopalan, V. Two-phonon coupling to the antiferromagnetic phase transition in multiferroic  $BiFeO_3$ . *Appl. Phys. Lett.* **2008**, 92, 022511.
- (11). Huang, F.; Lu, X.; Lin, W.; Wu, X.; Kan, Y.; Zhu, J. Effect of Nd dopant on magnetic and electric properties of  $BiFeO_3$  thin films prepared by metal organic deposition method. *Appl.*

*Phys. Lett.* **2006**, 89, 242914.
